# Supplementary material for: Cytotoxicity of Ferulic Acid on T24 Cell Line Differentiated by Different Microenvironments
Source: Hindawi journal article supplement (doi:10.1155/2013/579859), 2013-01-01
Supplement: f1 [file 579859.f1.pdf]

## Supplement

Fig. S1.

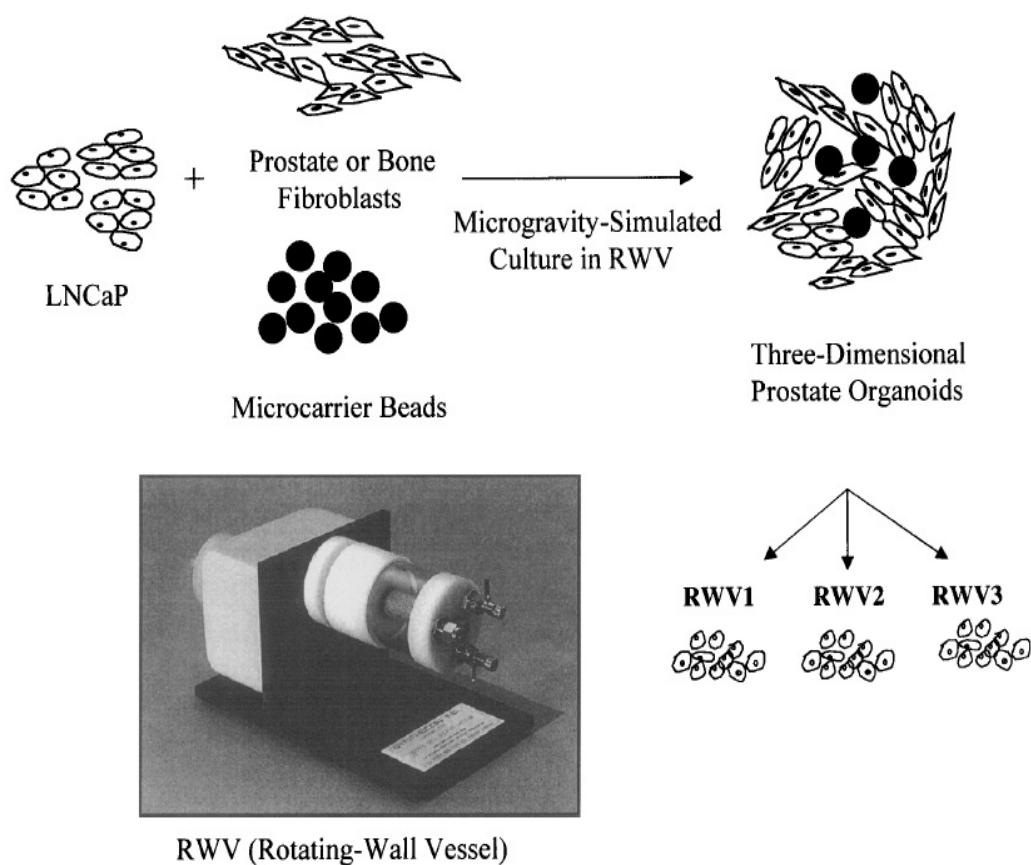

The NASA-engineered rotating wall vessel (RWV) tissue culture bioreactor system, manufactured by Synthecon (Houston, TX), addresses this need [7] (Fig. S1, Supplement).
